# Supplementary material for: Cortical signatures of sleep are altered following effective deep brain stimulation for depression
Source: bioRxiv or medRxiv preprint supplement (doi:10.1101/2023.12.08.23299724), 2023-12-09
Supplement: Supplementary file [file media-1.pdf]

## Supplementary Figures

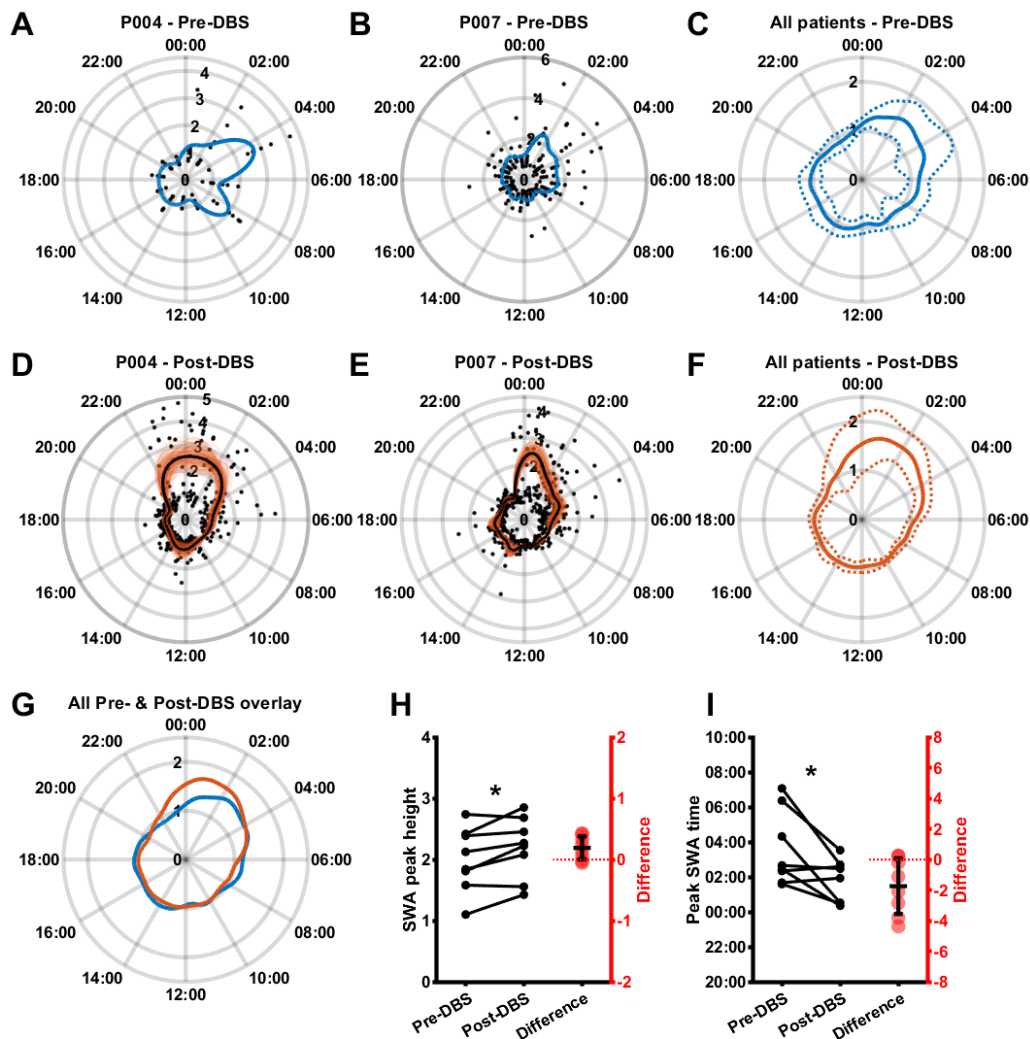

**Figure S1: Random resampling of the Post-DBS phase confirms that slow-wave activity is more temporally consistent and occurs earlier in the night after SCC DBS**

**A, B:** Log-transformed and median-normalized SWA power (mean across both hemispheres; black) and a smoothing spline fit (blue) around the 24 hours of the day in the Pre-DBS phase for two example patients. **C:** Mean (solid line) plus and minus standard deviation (dotted lines) across patients of Pre-DBS time-of-day fits as illustrated in A and B. **D, E:** Log-transformed and median-normalized SWA power (mean across both hemispheres; black) and 1000 overlaid smoothing spline fits (orange) as well as their mean (black) around the 24h of the day in the Post-DBS phase for the same example patients shown in A and B. **F:** Mean (solid line) plus and minus standard deviation (dotted lines) across patients of the mean resampled Post-DBS time-of-day fits as illustrated in D and E. **G:** Mean Pre-DBS (blue line) and resampled Post-DBS (orange line) time-of-day fits across patients highlighting increased SWA in the late evening and early night in the Post-DBS phase. **H:** Pre-DBS vs. resampled Post-DBS median height of the greatest night-time SWA peak as estimated by the time-of-day fit (normalised to median; Pre-DBS:  $2.00 \pm 0.53$ , Post-DBS:  $2.41 \pm 0.40$ ,  $t(7) = -3.81$ ,  $p = 0.0066$ ,  $n = 8$ ). **I:** Pre-DBS vs. resampled Post-DBS median time of day of the greatest night-time SWA peak as estimated by the time-of-day fit (in 24h clock time; Pre-DBS:  $03:34 \pm 02:08$ , Post-DBS:  $01:19 \pm 01:33$ ,  $t(7) = 3.26$ ,  $p = 0.0139$ ,  $n = 8$ ).

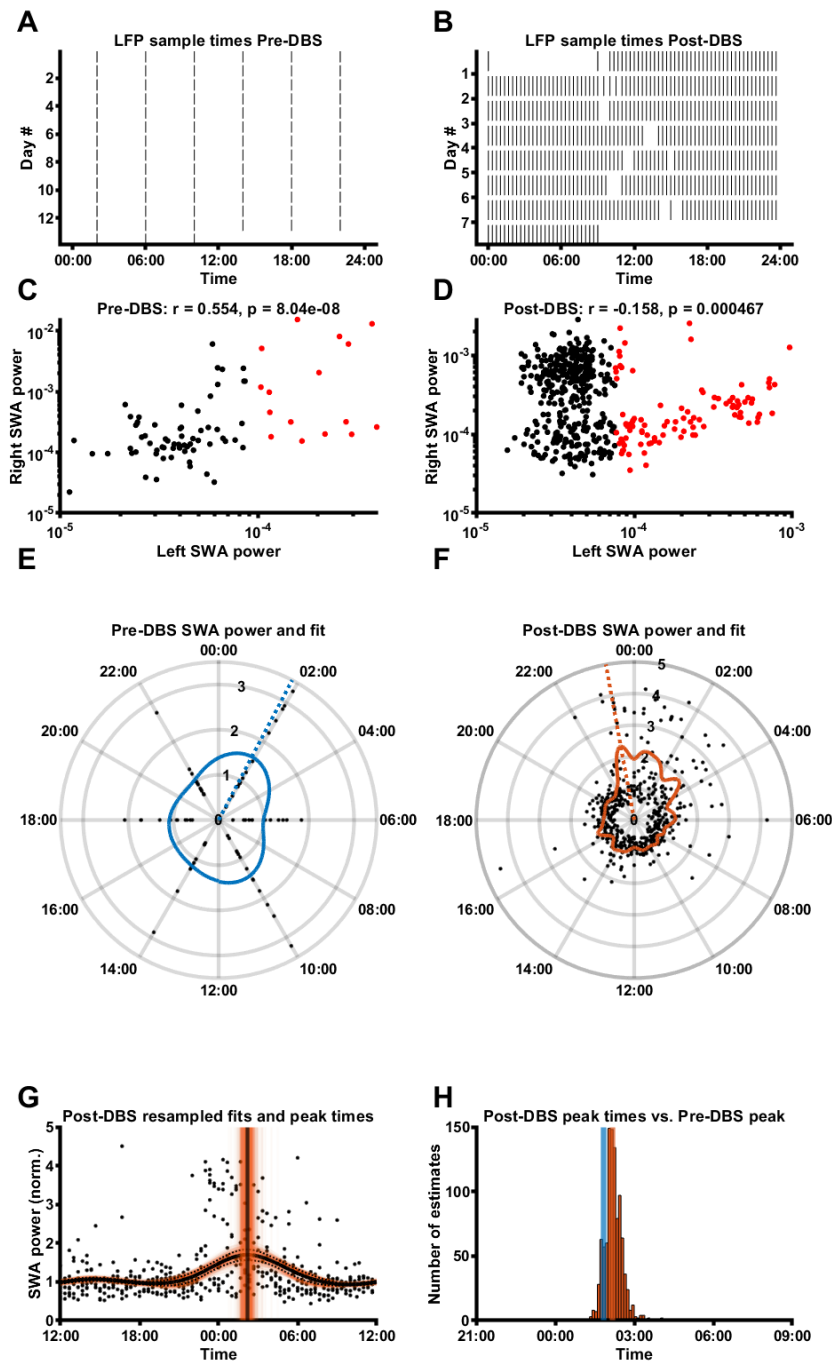

**Figure S2: P001 SWA data overview**

**A, B:** SCC LFP sample times in the Pre-DBS (A) and Post-DBS (B) phase. **C, D:** Correlation of left and right SCC SWA power Pre-DBS (C) and Post-DBS (D). **E, F:** SWA power (normalised to median) of all LFPs for this participant (mean across valid hemispheres), plotted around the 24h diurnal cycle. The coloured line represents a smoothing spline fit to the data; the dashed line represents the time of the maximum night-time (18:00-10:00) peak of the SWA fit. **G:** SWA power (normalised to median) of all LFPs for this participant (mean across valid hemispheres), with a mean $\pm$ SD fit line (solid black line and dashed black lines) superimposed on 1000 fit lines (thin, orange) obtained through random re-sampling of Post-DBS data according to the sample times Pre-DBS (see Methods for details). Also indicated is the median fit peak estimate (black vertical line) superimposed on 1000 fit peak estimate lines (thin orange vertical lines). **H:** Distribution of fit peak time estimates obtained through the 1000 random resamples of the Post-DBS phase, with the median peak time estimate indicated with the orange vertical line and the fit peak time from Phase B indicated with the blue vertical line.

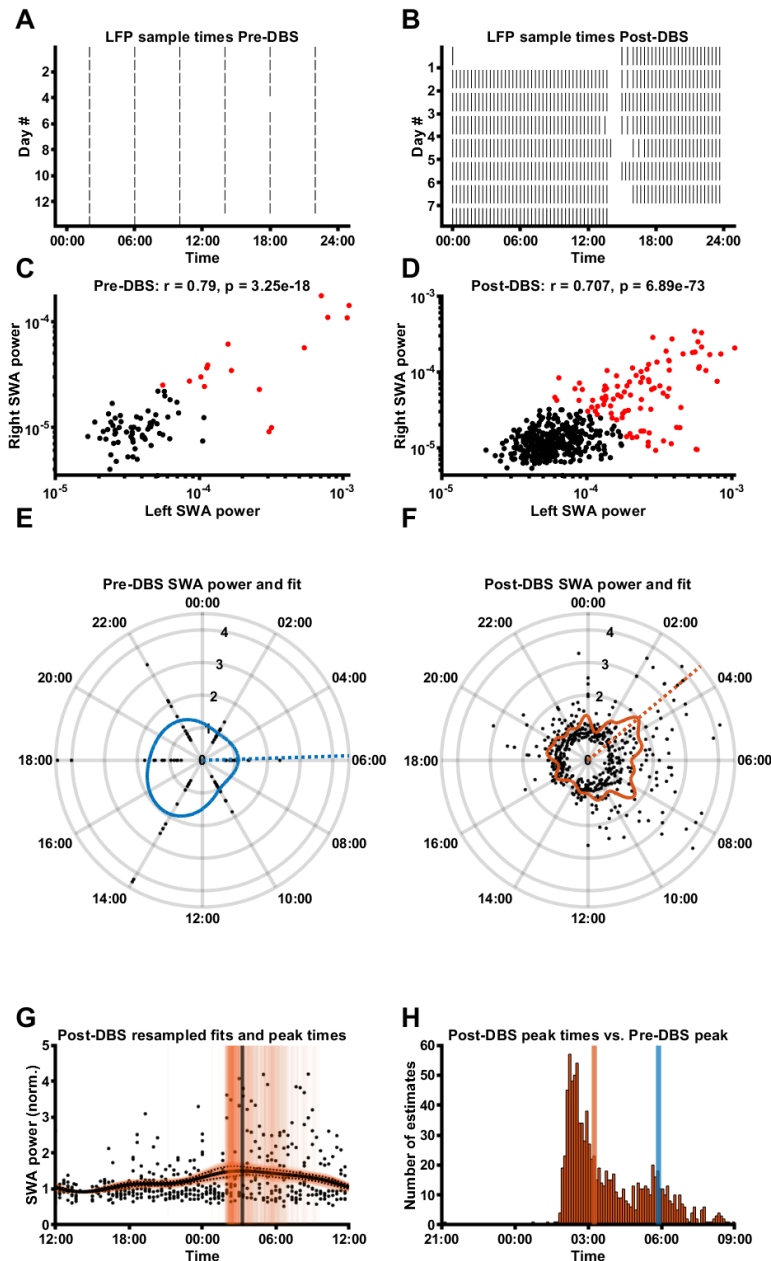

**Figure S3: P002 SWA data overview**

**A, B:** SCC LFP sample times in the Pre-DBS (A) and Post-DBS (B) phase. **C, D:** Correlation of left and right SCC SWA power Pre-DBS (C) and Post-DBS (D). **E, F:** SWA power (normalised to median) of all LFPs for this participant (mean across valid hemispheres), plotted around the 24h diurnal cycle. The coloured line represents a smoothing spline fit to the data; the dashed line represents the time of the maximum night-time (18:00-10:00) peak of the SWA fit. **G:** SWA power (normalised to median) of all LFPs for this participant (mean across valid hemispheres), with a mean $\pm$ SD fit line (solid black line and dashed black lines) superimposed on 1000 fit lines (thin, orange) obtained through random re-sampling of Post-DBS data according to the sample times Pre-DBS (see Methods for details). Also indicated is the median fit peak estimate (black vertical line) superimposed on 1000 fit peak estimate lines (thin orange vertical lines). **H:** Distribution of fit peak time estimates obtained through the 1000 random resamples of the Post-DBS phase, with the median peak time estimate indicated with the orange vertical line and the fit peak time from Phase B indicated with the blue vertical line.

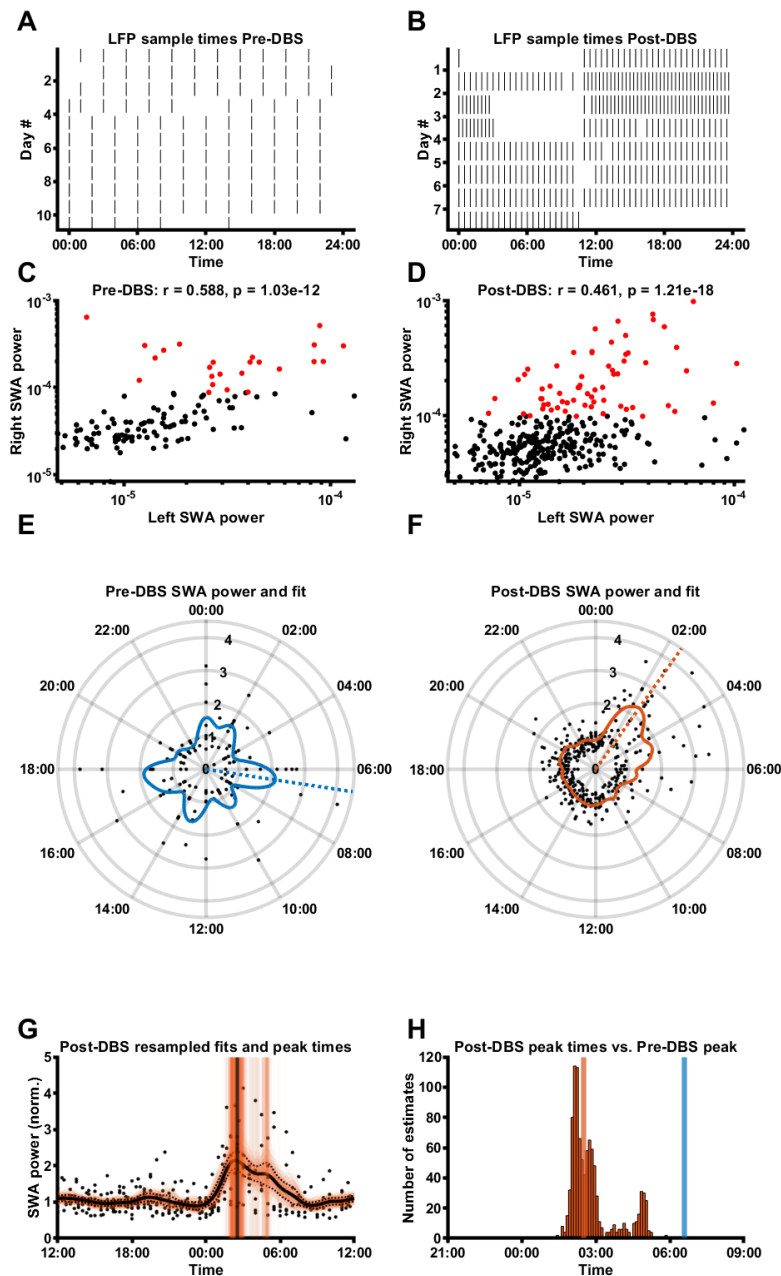

**Figure S4: P003 SWA data overview**

**A, B:** SCC LFP sample times in the Pre-DBS (A) and Post-DBS (B) phase. **C, D:** Correlation of left and right SCC SWA power Pre-DBS (C) and Post-DBS (D). **E, F:** SWA power (normalised to median) of all LFPs for this participant (mean across valid hemispheres), plotted around the 24h diurnal cycle. The coloured line represents a smoothing spline fit to the data; the dashed line represents the time of the maximum night-time (18:00-10:00) peak of the SWA fit. **G:** SWA power (normalised to median) of all LFPs for this participant (mean across valid hemispheres), with a mean $\pm$ SD fit line (solid black line and dashed black lines) superimposed on 1000 fit lines (thin, orange) obtained through random re-sampling of Post-DBS data according to the sample times Pre-DBS (see Methods for details). Also indicated is the median fit peak estimate (black vertical line) superimposed on 1000 fit peak estimate lines (thin orange vertical lines). **H:** Distribution of fit peak time estimates obtained through the 1000 random resamples of the Post-DBS phase, with the median peak time estimate indicated with the orange vertical line and the fit peak time from Phase B indicated with the blue vertical line.

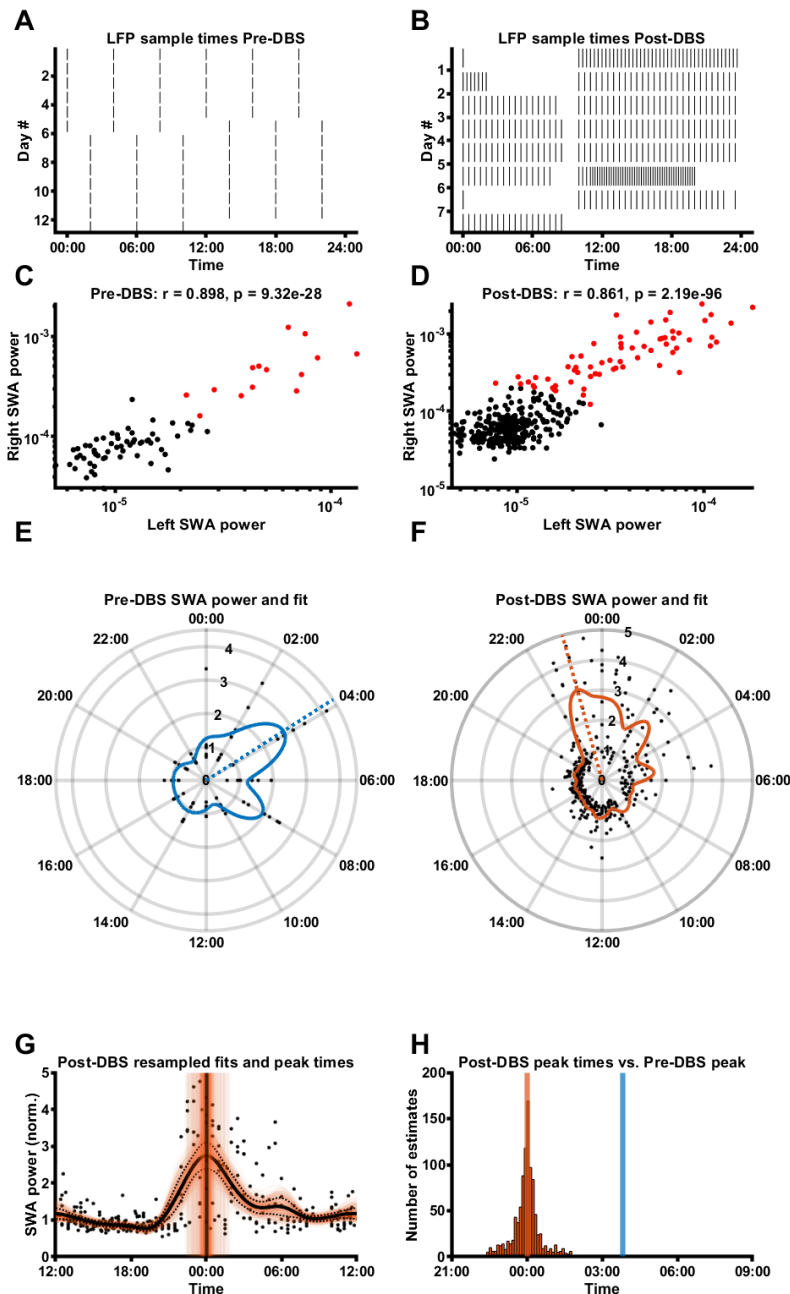

**Figure S5: P004 SWA data overview**

**A, B:** SCC LFP sample times in the Pre-DBS (A) and Post-DBS (B) phase. **C, D:** Correlation of left and right SCC SWA power Pre-DBS (C) and Post-DBS (D). **E, F:** SWA power (normalised to median) of all LFPs for this participant (mean across valid hemispheres), plotted around the 24h diurnal cycle. The coloured line represents a smoothing spline fit to the data; the dashed line represents the time of the maximum night-time (18:00-10:00) peak of the SWA fit. **G:** SWA power (normalised to median) of all LFPs for this participant (mean across valid hemispheres), with a mean $\pm$ SD fit line (solid black line and dashed black lines) superimposed on 1000 fit lines (thin, orange) obtained through random re-sampling of Post-DBS data according to the sample times Pre-DBS (see Methods for details). Also indicated is the median fit peak estimate (black vertical line) superimposed on 1000 fit peak estimate lines (thin orange vertical lines). **H:** Distribution of fit peak time estimates obtained through the 1000 random resamples of the Post-DBS phase, with the median peak time estimate indicated with the orange vertical line and the fit peak time from Phase B indicated with the blue vertical line.

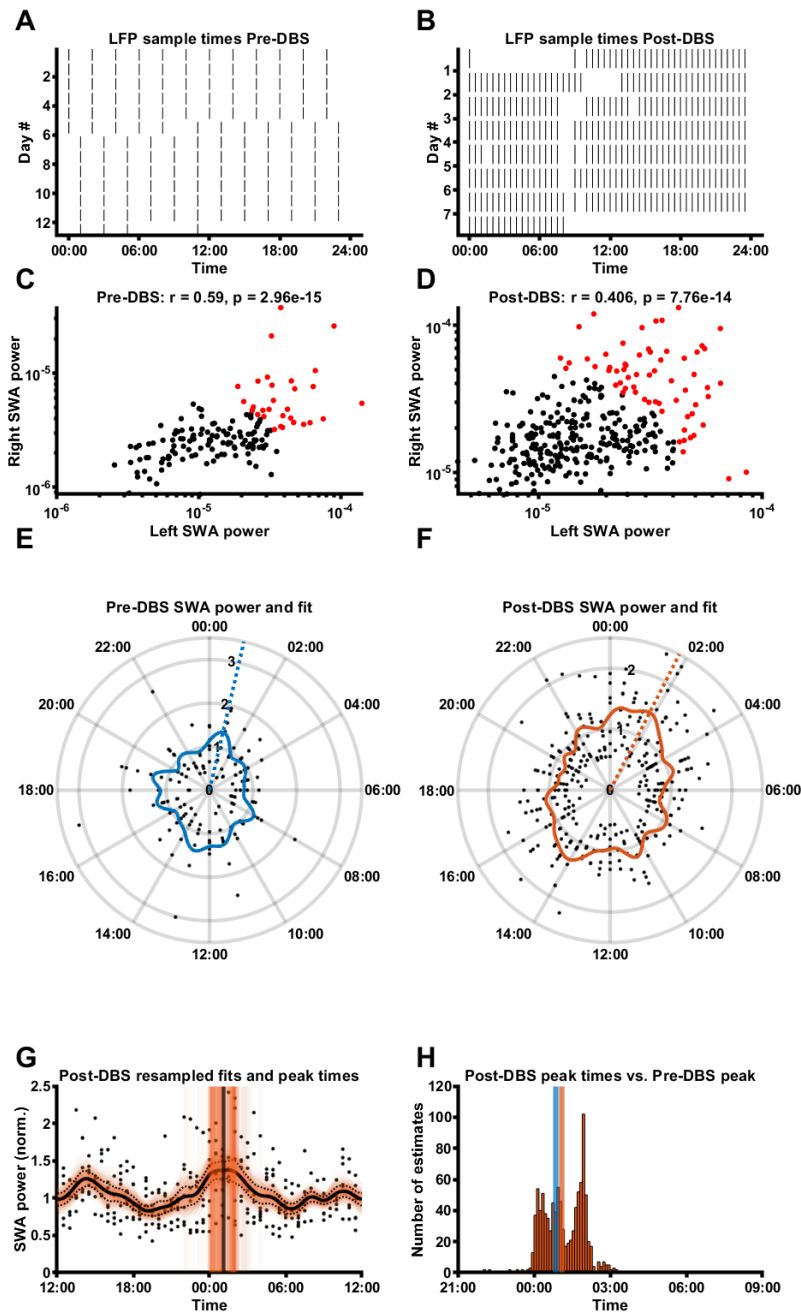

**Figure S6: P005 SWA data overview**

**A, B:** SCC LFP sample times in the Pre-DBS (A) and Post-DBS (B) phase. **C, D:** Correlation of left and right SCC SWA power Pre-DBS (C) and Post-DBS (D). **E, F:** SWA power (normalised to median) of all LFPs for this participant (mean across valid hemispheres), plotted around the 24h diurnal cycle. The coloured line represents a smoothing spline fit to the data; the dashed line represents the time of the maximum night-time (18:00-10:00) peak of the SWA fit. **G:** SWA power (normalised to median) of all LFPs for this participant (mean across valid hemispheres), with a mean $\pm$ SD fit line (solid black line and dashed black lines) superimposed on 1000 fit lines (thin, orange) obtained through random re-sampling of Post-DBS data according to the sample times Pre-DBS (see Methods for details). Also indicated is the median fit peak estimate (black vertical line) superimposed on 1000 fit peak estimate lines (thin orange vertical lines). **H:** Distribution of fit peak time estimates obtained through the 1000 random resamples of the Post-DBS phase, with the median peak time estimate indicated with the orange vertical line and the fit peak time from Phase B indicated with the blue vertical line.

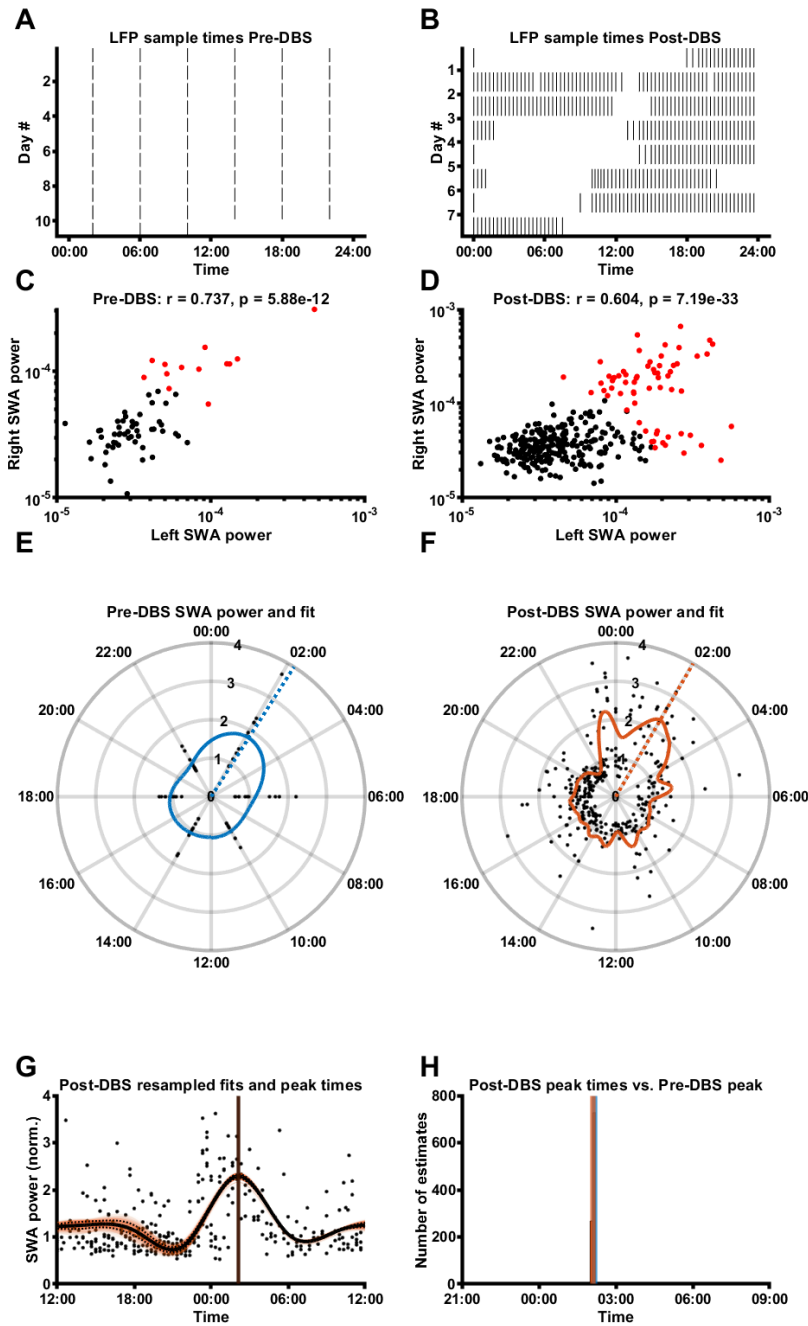

**Figure S7: P006 SWA data overview**

**A, B:** SCC LFP sample times in the Pre-DBS (A) and Post-DBS (B) phase. **C, D:** Correlation of left and right SCC SWA power Pre-DBS (C) and Post-DBS (D). **E, F:** SWA power (normalised to median) of all LFPs for this participant (mean across valid hemispheres), plotted around the 24h diurnal cycle. The coloured line represents a smoothing spline fit to the data; the dashed line represents the time of the maximum night-time (18:00-10:00) peak of the SWA fit. **G:** SWA power (normalised to median) of all LFPs for this participant (mean across valid hemispheres), with a mean $\pm$ SD fit line (solid black line and dashed black lines) superimposed on 1000 fit lines (thin, orange) obtained through random re-sampling of Post-DBS data according to the sample times Pre-DBS (see Methods for details). Also indicated is the median fit peak estimate (black vertical line) superimposed on 1000 fit peak estimate lines (thin orange vertical lines). **H:** Distribution of fit peak time estimates obtained through the 1000 random resamples of the Post-DBS phase, with the median peak time estimate indicated with the orange vertical line and the fit peak time from Phase B indicated with the blue vertical line.

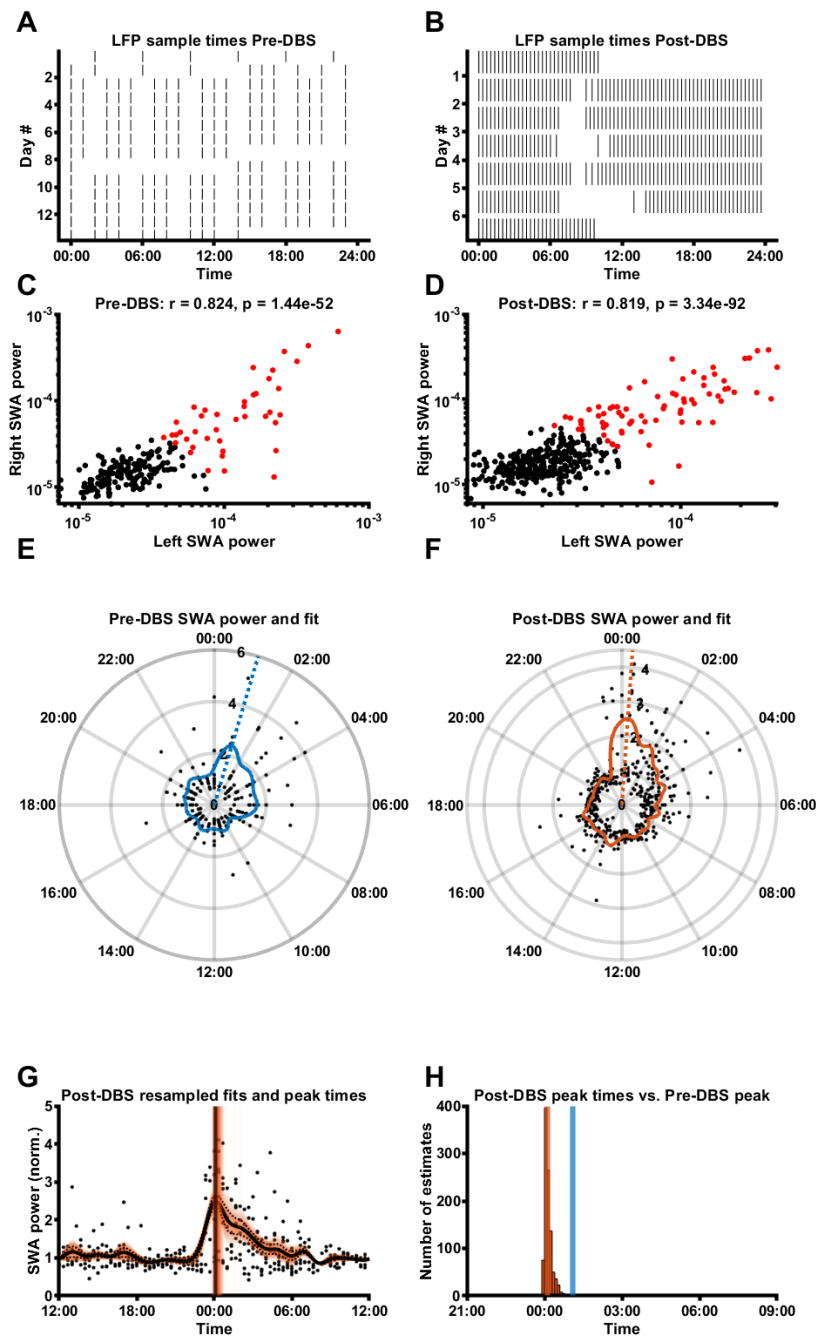

**Figure S8: P007 SWA data overview**

**A, B:** SCC LFP sample times in the Pre-DBS (A) and Post-DBS (B) phase. **C, D:** Correlation of left and right SCC SWA power Pre-DBS (C) and Post-DBS (D). **E, F:** SWA power (normalised to median) of all LFPs for this participant (mean across valid hemispheres), plotted around the 24h diurnal cycle. The coloured line represents a smoothing spline fit to the data; the dashed line represents the time of the maximum night-time (18:00-10:00) peak of the SWA fit. **G:** SWA power (normalised to median) of all LFPs for this participant (mean across valid hemispheres), with a mean $\pm$ SD fit line (solid black line and dashed black lines) superimposed on 1000 fit lines (thin, orange) obtained through random re-sampling of Post-DBS data according to the sample times Pre-DBS (see Methods for details). Also indicated is the median fit peak estimate (black vertical line) superimposed on 1000 fit peak estimate lines (thin orange vertical lines). **H:** Distribution of fit peak time estimates obtained through the 1000 random resamples of the Post-DBS phase, with the median peak time estimate indicated with the orange vertical line and the fit peak time from Phase B indicated with the blue vertical line.



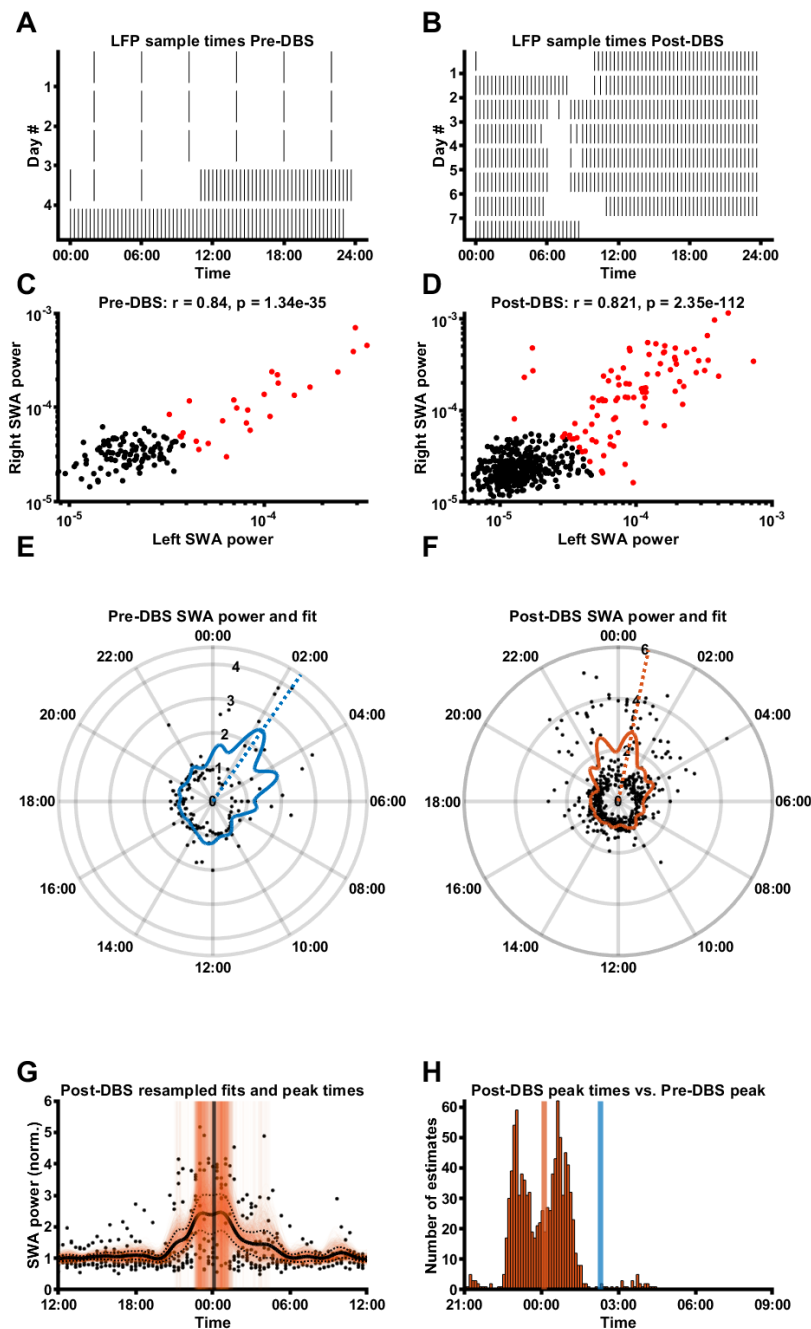

**Figure S9: P008 SWA data overview**

**A, B:** SCC LFP sample times in the Pre-DBS (A) and Post-DBS (B) phase. **C, D:** Correlation of left and right SCC SWA power Pre-DBS (C) and Post-DBS (D). **E, F:** SWA power (normalised to median) of all LFPs for this participant (mean across valid hemispheres), plotted around the 24h diurnal cycle. The coloured line represents a smoothing spline fit to the data; the dashed line represents the time of the maximum night-time (18:00-10:00) peak of the SWA fit. **G:** SWA power (normalised to median) of all LFPs for this participant (mean across valid hemispheres), with a mean $\pm$ SD fit line (solid black line and dashed black lines) superimposed on 1000 fit lines (thin, orange) obtained through random re-sampling of Post-DBS data according to the sample times Pre-DBS (see Methods for details). Also indicated is the median fit peak estimate (black vertical line) superimposed on 1000 fit peak estimate lines (thin orange vertical lines). **H:** Distribution of fit peak time estimates obtained through the 1000 random resamples of the Post-DBS phase, with the median peak time estimate indicated with the orange vertical line and the fit peak time from Phase B indicated with the blue vertical line.

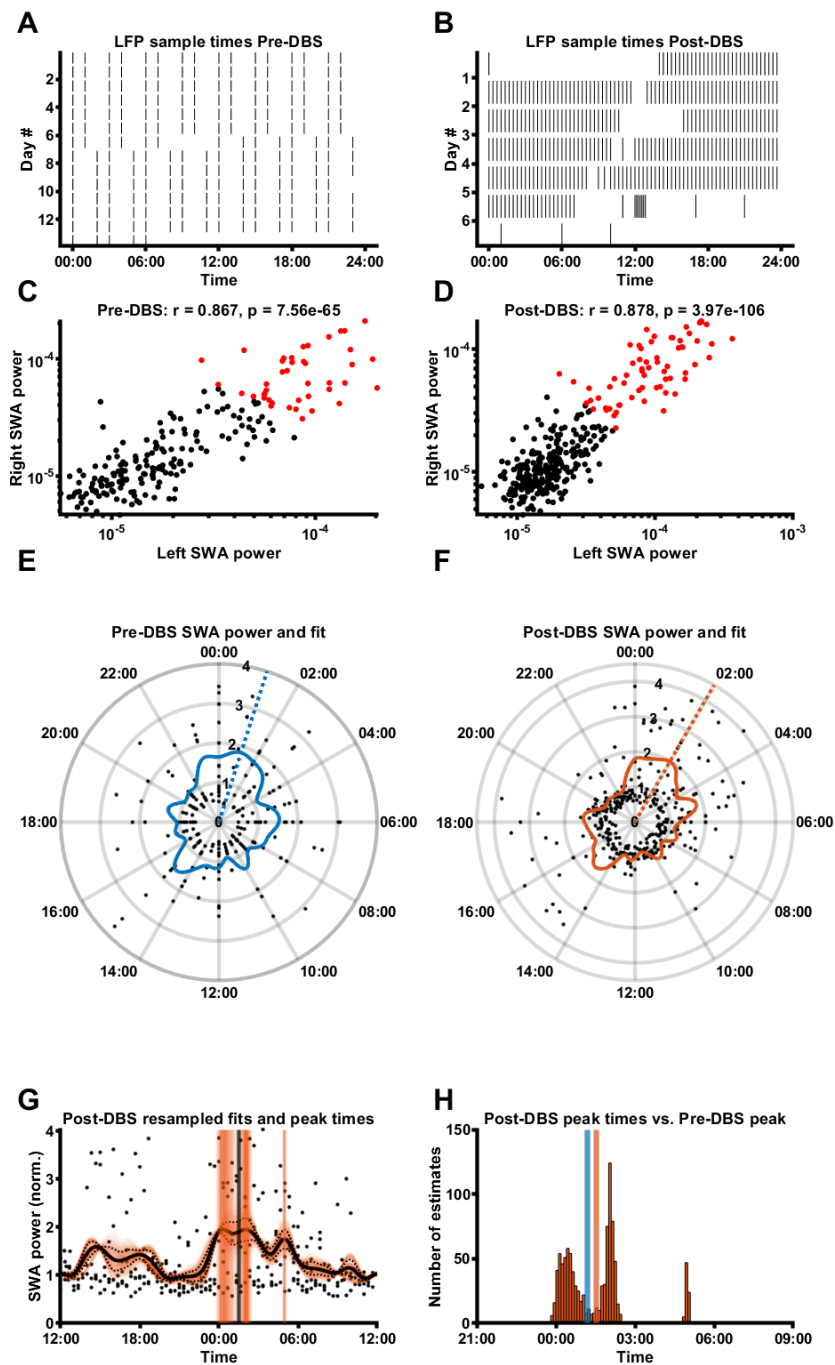

**Figure S10: P009 SWA data overview**

**A, B:** SCC LFP sample times in the Pre-DBS (A) and Post-DBS (B) phase. **C, D:** Correlation of left and right SCC SWA power Pre-DBS (C) and Post-DBS (D). **E, F:** SWA power (normalised to median) of all LFPs for this participant (mean across valid hemispheres), plotted around the 24h diurnal cycle. The coloured line represents a smoothing spline fit to the data; the dashed line represents the time of the maximum night-time (18:00-10:00) peak of the SWA fit. **G:** SWA power (normalised to median) of all LFPs for this participant (mean across valid hemispheres), with a mean $\pm$ SD fit line (solid black line and dashed black lines) superimposed on 1000 fit lines (thin, orange) obtained through random re-sampling of Post-DBS data according to the sample times Pre-DBS (see Methods for details). Also indicated is the median fit peak estimate (black vertical line) superimposed on 1000 fit peak estimate lines (thin orange vertical lines). **H:** Distribution of fit peak time estimates obtained through the 1000 random resamples of the Post-DBS phase, with the median peak time estimate indicated with the orange vertical line and the fit peak time from Phase B indicated with the blue vertical line.

## Supplementary tables

Supplementary Table 1: Patient medication intake schedule (kept constant between study phases)

| Patient ID  | Medication / supplement                            | Regime    |  |
|-------------|----------------------------------------------------|-----------|--|
| <b>P001</b> | Bupropion extended release 300 mg                  | qDay      |  |
|             | Bupropion 75 mg                                    | qDay      |  |
|             | Bupropion extended release 150 mg                  | q24hr     |  |
|             | Cephalexin 500 mg                                  | QID       |  |
|             | Cholecalciferol 2,000 IU                           | qDay      |  |
|             | Clonazepam 0.5 mg                                  | qHS, PRN  |  |
|             | Ferrous gluconate 325 mg                           | qDay      |  |
|             | l-methylfolate 15 mg                               | qDay      |  |
|             |                                                    |           |  |
| <b>P002</b> | Citalopram                                         |           |  |
|             | Desvenlafaxine 50 mg extended release              | qDay      |  |
|             | Docusate 100 mg                                    | BID, PRN  |  |
|             | Lamotrigine 200 mg                                 |           |  |
|             | Ondansetron 4 mg                                   | q8hr, PRN |  |
|             |                                                    |           |  |
| <b>P003</b> | Clonazepam 2 mg                                    | qHS       |  |
|             | Dextromethorphan 30 mg                             | qDay      |  |
|             | Diazepam 5 mg                                      | q8hr, PRN |  |
|             | Diltiazem 180 mg                                   | qDay      |  |
|             | Diphenhydramine 25 mg                              | qHS       |  |
|             | Docusate 100 mg                                    | q12hr     |  |
|             | Escitalopram 40 mg                                 | qDay      |  |
|             | Melatonin 5 mg                                     | qHS       |  |
|             | Omega-3 polyunsaturated fatty acids 1,000 mg       | TID       |  |
|             | Ondansetron 4 mg                                   | q8hr, PRN |  |
|             | Acetaminophen/aspirin/caffeine (Excedrin) 2 tab(s) | q6hr      |  |
|             |                                                    |           |  |
|             |                                                    |           |  |
| <b>P004</b> | Lunesta 3mg                                        | qHS,PRN   |  |
|             | Gabapentin 300 mg                                  | TID       |  |
|             | l-methylfolate                                     | qDay      |  |
|             | Fetzima 120 mg,                                    | qDay      |  |
|             | Ativan 1 mg,                                       | BID, PRN  |  |
|             | Quetiapine 200 mg                                  | qPM       |  |
|             | Tramadol 50 mg                                     | q4hr      |  |
|             |                                                    |           |  |
| <b>P005</b> | Clonazepam 1.5 mg                                  | qHS       |  |
|             | Levothyroxine 175 mcg                              | qDay      |  |
|             | Nicotine 1 patch(es), Topical                      | q24hr     |  |
|             | Nortriptyline 150 mg                               | qHS       |  |
|             | Quetiapine 300 mg                                  | qHS       |  |

|             |                      |          |
|-------------|----------------------|----------|
|             | Sertraline 50 mg     | qDay     |
|             | Sertraline 100 mg    | qDay     |
|             |                      |          |
| <b>P006</b> | Amitriptyline 350 mg |          |
|             | Lorazepam 1 mg       | TID, PRN |
|             |                      |          |
| <b>P007</b> | Adderall 30mg        |          |
|             | Clonazepam 1 mg      |          |
|             | Pristiq              | qDay     |
|             |                      |          |
| <b>P008</b> | Bupropion 450 mg     | q24hr    |
|             | Lunesta 1 mg,        | qHS, PRN |
|             | Lorazepam 0.5 mg     | BID, PRN |
|             | Trokendi XR 200 mg   | qDay     |
|             |                      |          |
| <b>P009</b> | Klonopin 0.5 mg      | BID      |
|             | Cymbalta 120 mg      | qDay     |
|             | Lithium 300 mg       |          |

**Supplementary Table 2: Pearson's correlation coefficients of Pre-DBS Hamilton scores and sleep subscales vs. SWA fit peak time and height. Bonferroni-corrected alpha level = 0.01.**

|                          | SWA peak time |                               | SWA peak height |                               |
|--------------------------|---------------|-------------------------------|-----------------|-------------------------------|
|                          | <i>r</i>      | <i>p</i><br>( $\alpha=0.01$ ) | <i>r</i>        | <i>p</i><br>( $\alpha=0.01$ ) |
| <b>Hamilton score</b>    | -0.567        | 0.143                         | 0.418           | 0.302                         |
| <b>Initial insomnia</b>  | -0.439        | 0.276                         | -0.027          | 0.950                         |
| <b>Midnight insomnia</b> | -0.310        | 0.455                         | 0.278           | 0.506                         |
| <b>Morning insomnia</b>  | -0.501        | 0.206                         | -0.074          | 0.862                         |
| <b>Hypersomnia</b>       | -0.132        | 0.755                         | 0.341           | 0.408                         |

**Supplementary Table 3: Pearson's correlation coefficients of the Pre- vs. Post-DBS difference in Hamilton scores and sleep subscales vs. the Pre- vs. Post-DBS difference in SWA fit peak time and height. Bonferroni-corrected alpha level = 0.01.**

|                                              | $\Delta$ SWA peak time |                               | $\Delta$ SWA peak height |                               |
|----------------------------------------------|------------------------|-------------------------------|--------------------------|-------------------------------|
|                                              | <i>r</i>               | <i>p</i><br>( $\alpha=0.01$ ) | <i>r</i>                 | <i>p</i><br>( $\alpha=0.01$ ) |
| <b><math>\Delta</math> Hamilton score</b>    | 0.004                  | 0.993                         | 0.130                    | 0.759                         |
| <b><math>\Delta</math> Initial insomnia</b>  | -0.204                 | 0.628                         | -0.061                   | 0.885                         |
| <b><math>\Delta</math> Midnight insomnia</b> | 0.022                  | 0.958                         | -0.359                   | 0.382                         |
| <b><math>\Delta</math> Morning insomnia</b>  | -0.636                 | 0.090                         | -0.071                   | 0.867                         |
| <b><math>\Delta</math> Hypersomnia</b>       | -0.158                 | 0.709                         | 0.712                    | 0.048                         |

**Supplementary Table 4: Pearson’s correlation coefficients of the Pre- vs. Post-DBS difference in Hamilton scores and sleep subscales vs. the Pre- vs. Post-DBS difference in spindle density and amplitude. Bonferroni-corrected alpha level = 0.01.**

|                            | <b>Δ Spindle density</b> |                               | <b>Δ Spindle amplitude</b> |                               |
|----------------------------|--------------------------|-------------------------------|----------------------------|-------------------------------|
|                            | <i>r</i>                 | <i>p</i><br>( $\alpha=0.01$ ) | <i>r</i>                   | <i>p</i><br>( $\alpha=0.01$ ) |
| <b>Δ Hamilton score</b>    | 0.231                    | 0.583                         | 0.236                      | 0.574                         |
| <b>Δ Initial insomnia</b>  | -0.579                   | 0.133                         | 0.188                      | 0.656                         |
| <b>Δ Midnight insomnia</b> | 0.481                    | 0.228                         | 0.117                      | 0.783                         |
| <b>Δ Morning insomnia</b>  | -0.152                   | 0.719                         | -0.458                     | 0.254                         |
| <b>Δ Hypersomnia</b>       | 0.498                    | 0.209                         | 0.214                      | 0.611                         |
